# Supplementary material
Source: PubMed Central journal article supplement (PMC5830365)
Supplement: 2017_185249-Disclosures_and_Contributions.pdf [file 2017_185249-Disclosures_and_Contributions.pdf]

Haematologica  
HAEMATOL/2017/185249  
Version 2

Partial tandem duplication of KMT2A (MLL) may predict a subset of  
myelodysplastic syndrome with unique characteristics and poor  
outcome

Sarah M. Choi, Rajan Dewar, Patrick W. Burke, and Lina Shao

Disclosures: None

Contributions: S.M.C. and L.S. designed the study and collected and analyzed the data. P.B. also analyzed the data. S.M.C., R.D., P.B., and L.S. wrote and/or edited the manuscript.
